# Supplementary material
Source: PubMed Central journal article supplement (PMC10188638)
Supplement: mmc1.pdf [file mmc1.pdf]

## **Supplemental Information**

**Reactive oxygen species-responsive nanocarrier  
ameliorates murine colitis by intervening  
colonic innate and adaptive immune responses**

**Xiangji Yan, Lingzhang Meng, Xingzhe Zhang, Zhichao Deng, Bowen Gao, Yujie Zhang, Mei Yang, Yana Ma, Yuanyuan Zhang, Kangsheng Tu, Mingzhen Zhang, and Qiuran Xu**

## Supplemental data

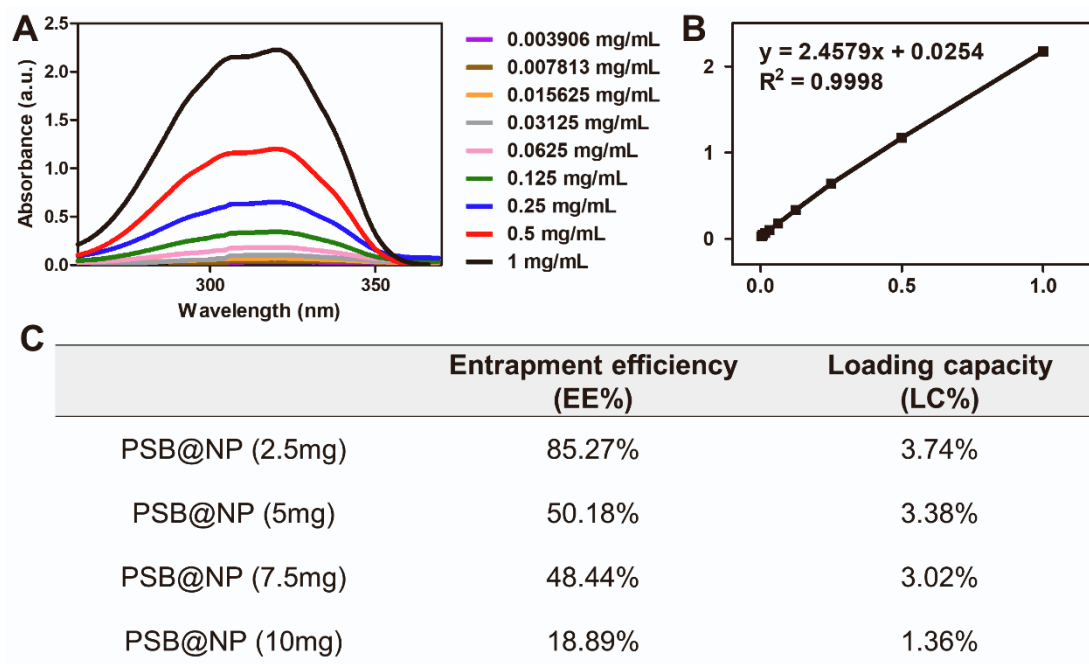

**Figure S1.** The entrapment efficiency and loading capacity of PSB in PSB@NPs were measured by a UV-vis spectrophotometer. (A) Absorption peaks of PSB with different concentrations. (B) The standard curve. (C) The entrapment efficiency and loading capacity of different dosages of PSB in PSB@NP.

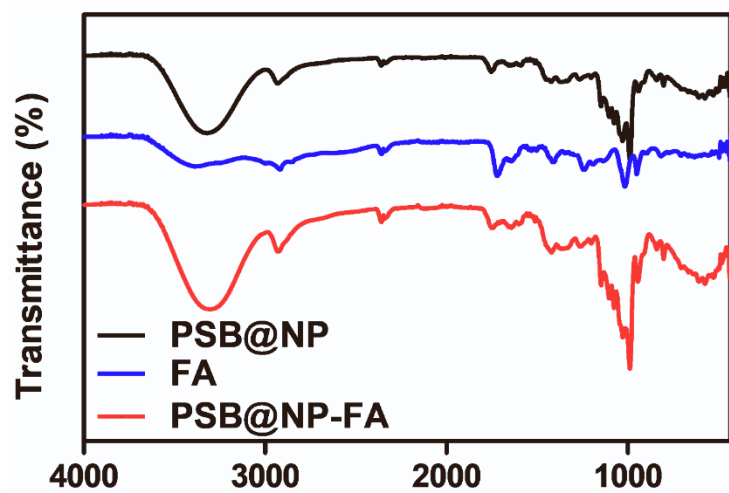

**Figure S2.** FTIR spectra of PSB@NP, FA and PSB@NP-FA.

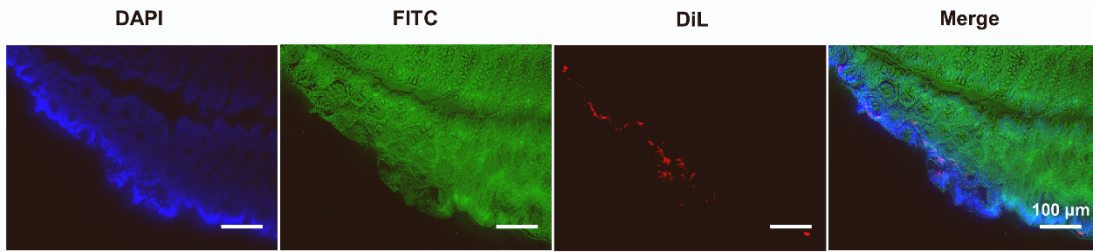

**Figure S3.** Frozen sections of colon tissues uptake with DiL labeled-NP. Phalloidin-FITC (green) represents actin and DAPI (blue) for nuclei. Scale bar: 100 μm.

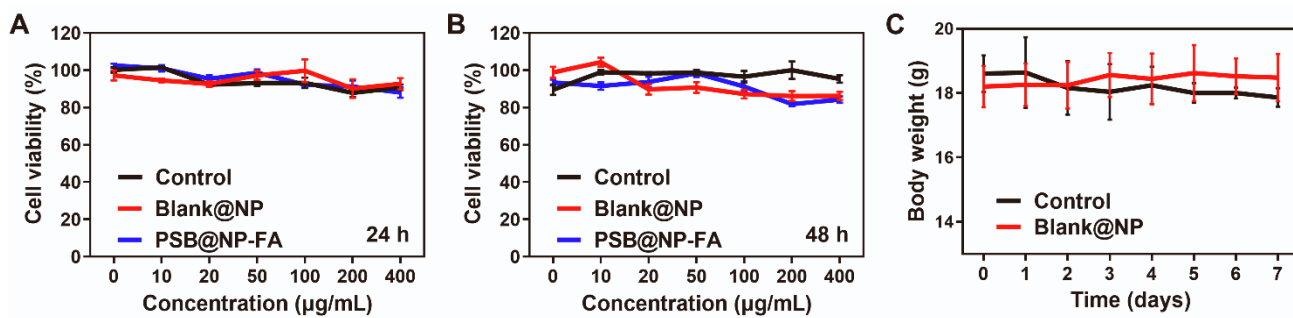

**Figure S4.** Biocompatibility of NP was assessed *in vitro* and *in vivo*. (A) *In vitro* cytotoxicity of different concentrations of Blank@NP and PSB@NP-FA in RAW 264.7 cells after incubating for 24 h and 48 h, as determined by MTT assay. (B) *In vitro* cytotoxicity of different concentrations of Blank@NP and PSB@NP-FA in RAW 264.7 cells after incubating for 48 h. (C) Daily changes in body weight of healthy mice treated daily for 7 days with Blank@NP or saline (n = 5).

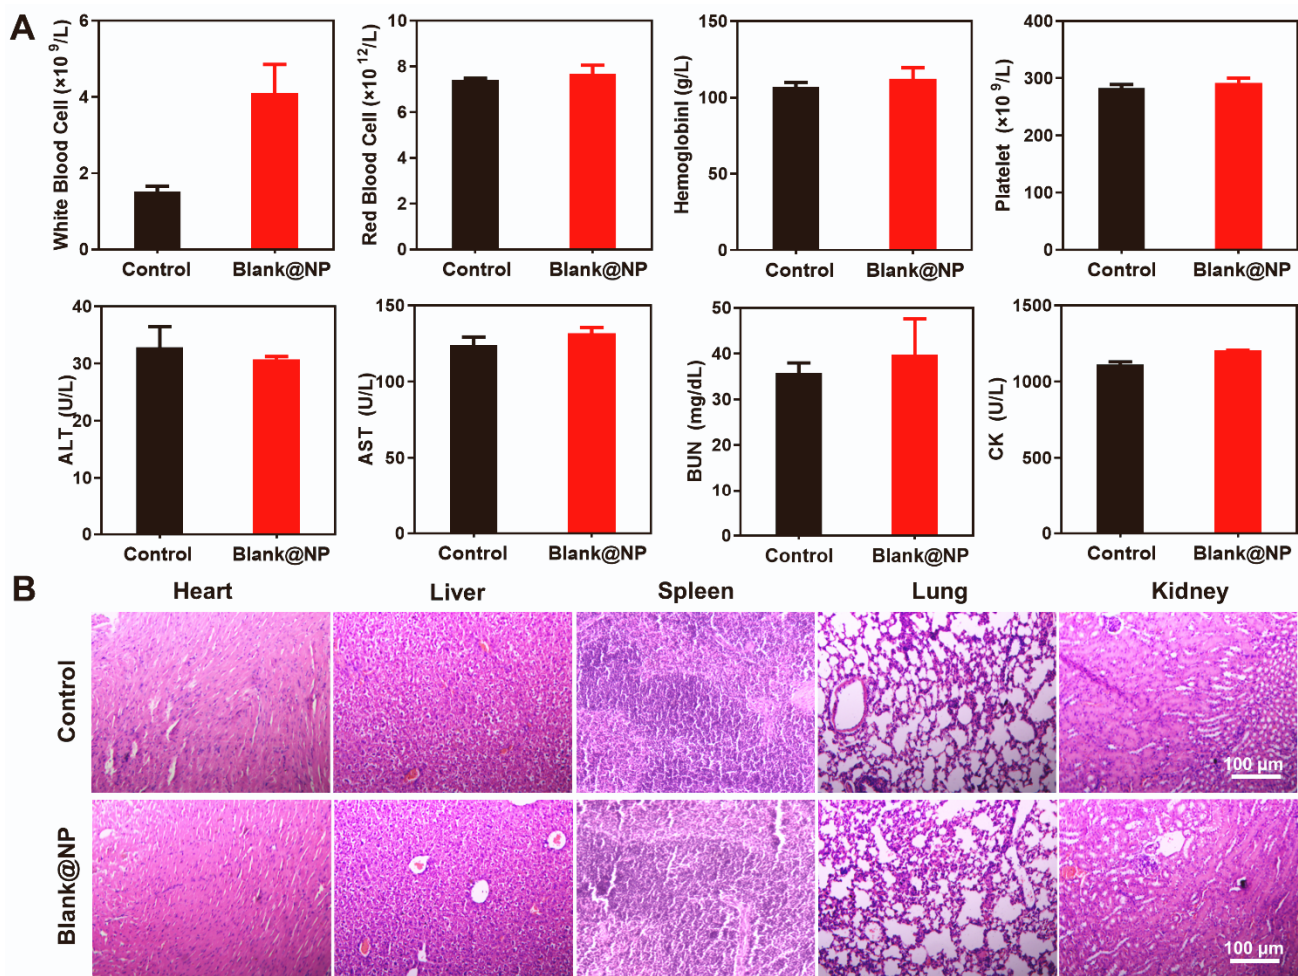

**Figure S5.** Biocompatibility evaluation of NP. (A) Biocompatibility evaluation was evaluated by analyzing hematology and biochemistry parameters, (n = 5). (B) Representative photomicrographs of H&E-stained sections of the major organs (heart, kidney, liver, lung, and spleen). Scale bar: 100  $\mu$ m.

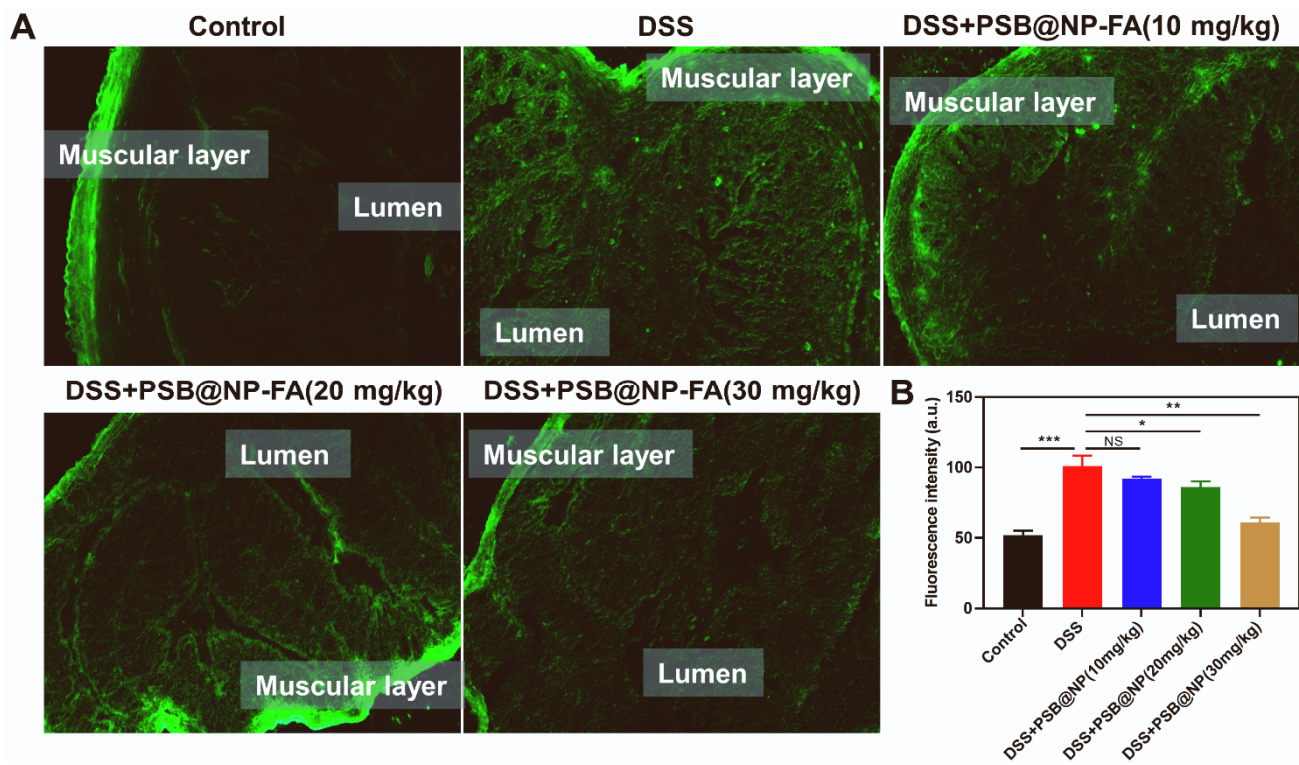

**Figure S6.** The level of ROS *in vivo* was detected by ROS probe DCFH-DA. (A) Fluorescence intensity of frozen sections of colon tissues in different treatment groups. (B) Histogram of fluorescence signal statistics of different groups.

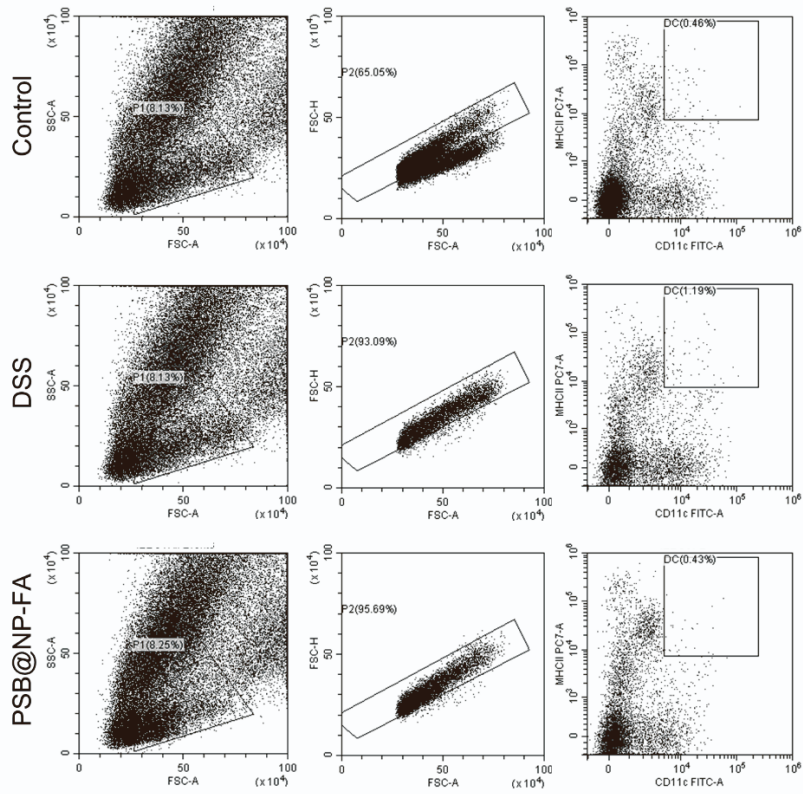

**Figure S7.** Scatter plots of Figure 5A.



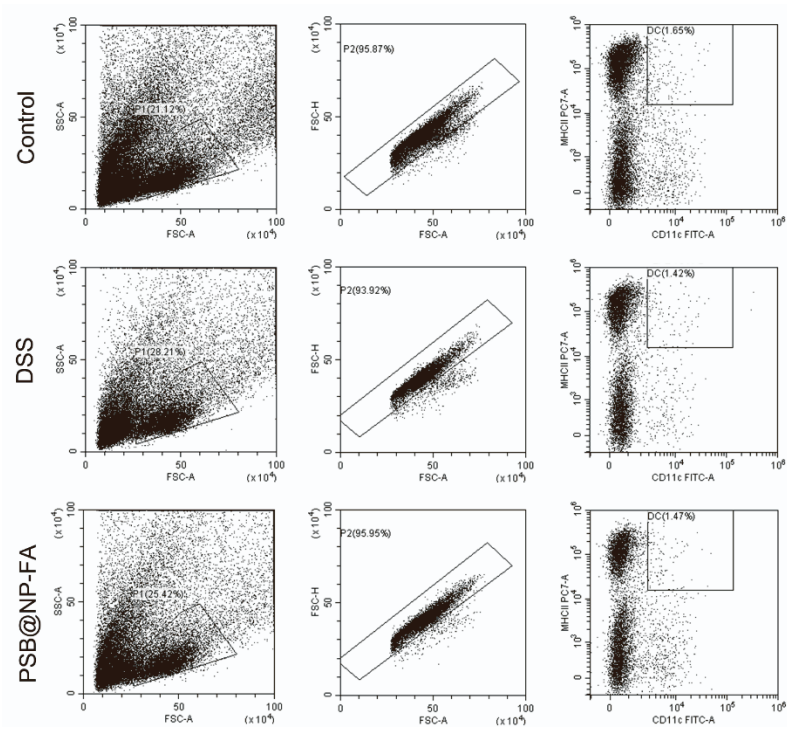

**Figure S8.** Scatter plots of Figure 5B.

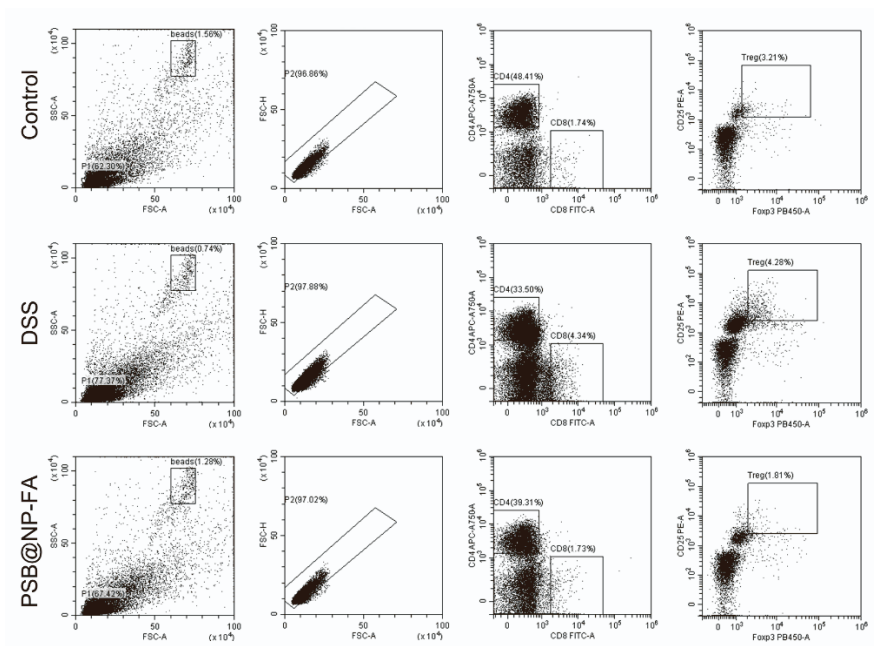

**Figure S9.** Scatter plots of Figure 6C.

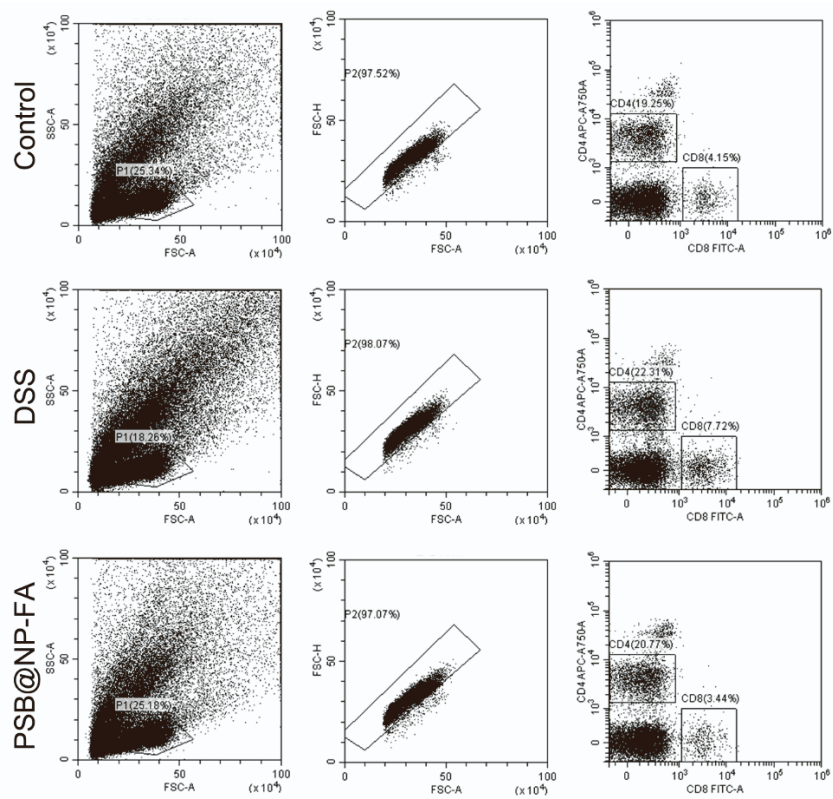

**Figure S10.** Scatter plots of Figure 6E.

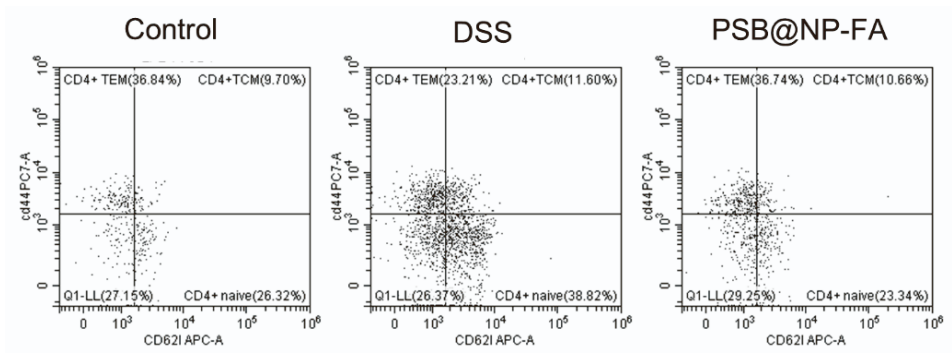

**Figure S11.** Scatter plots of Figure 6 FGH.

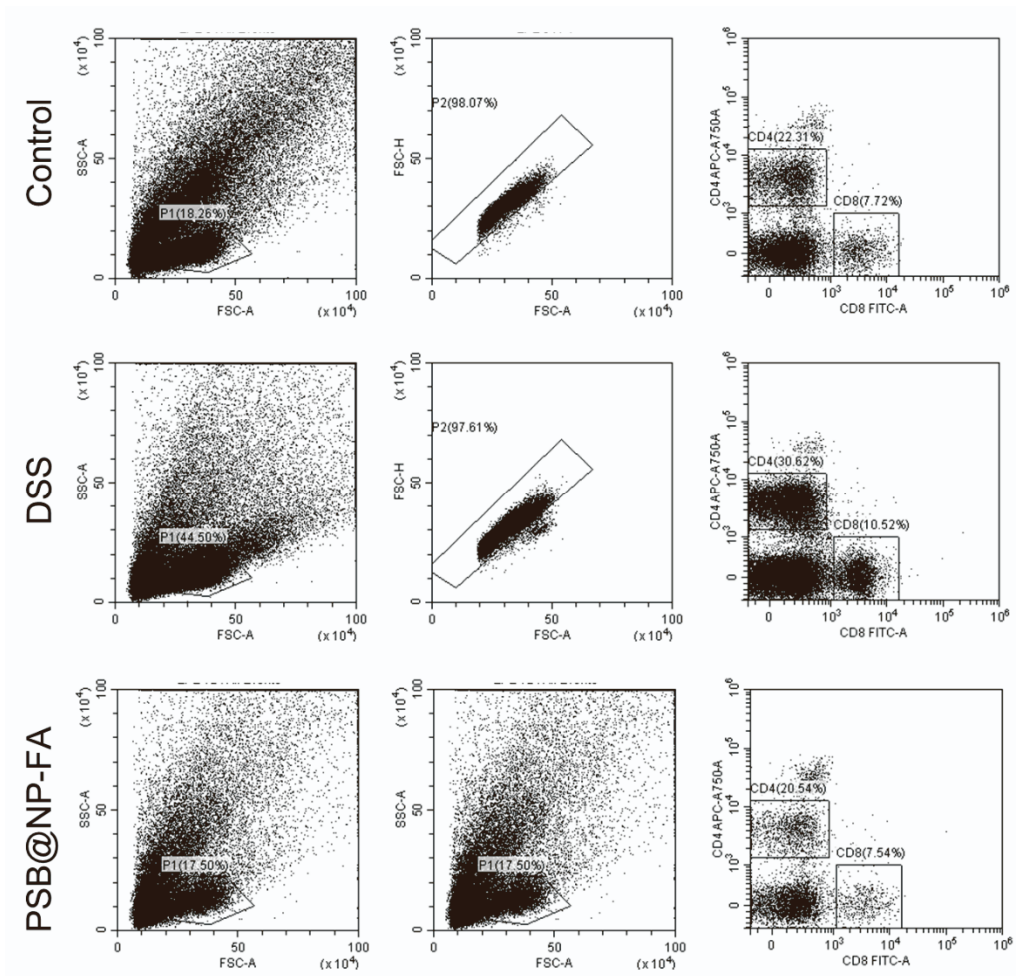

**Figure S12.** Scatter plots of Figure 6M.

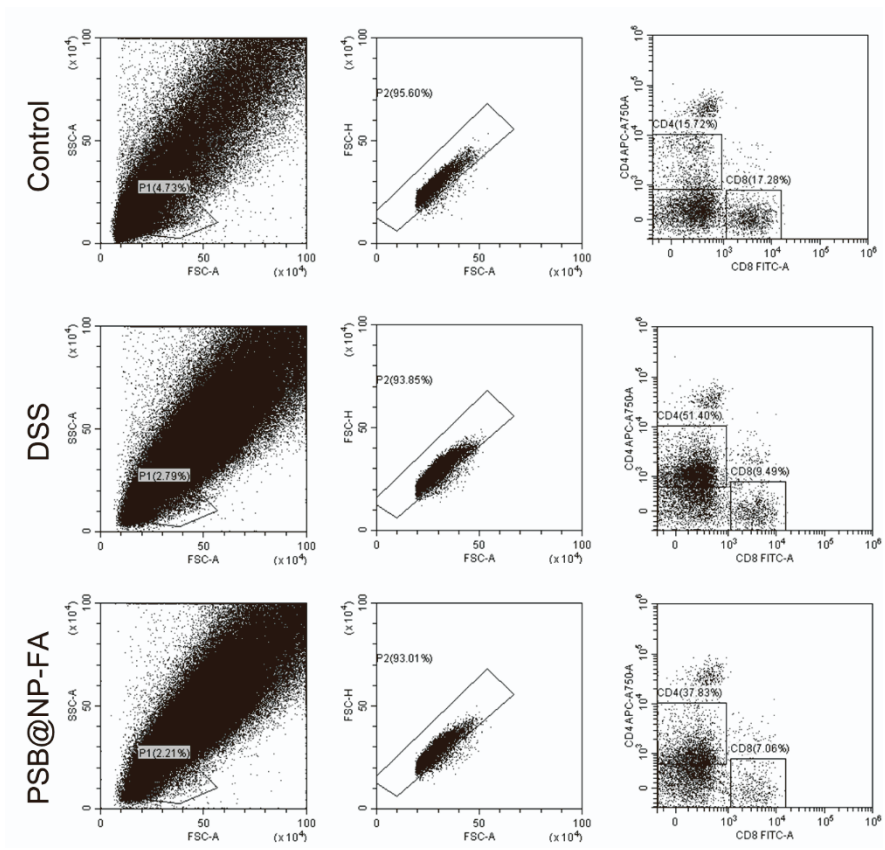

**Figure S13.** Scatter plots of Figure 60.

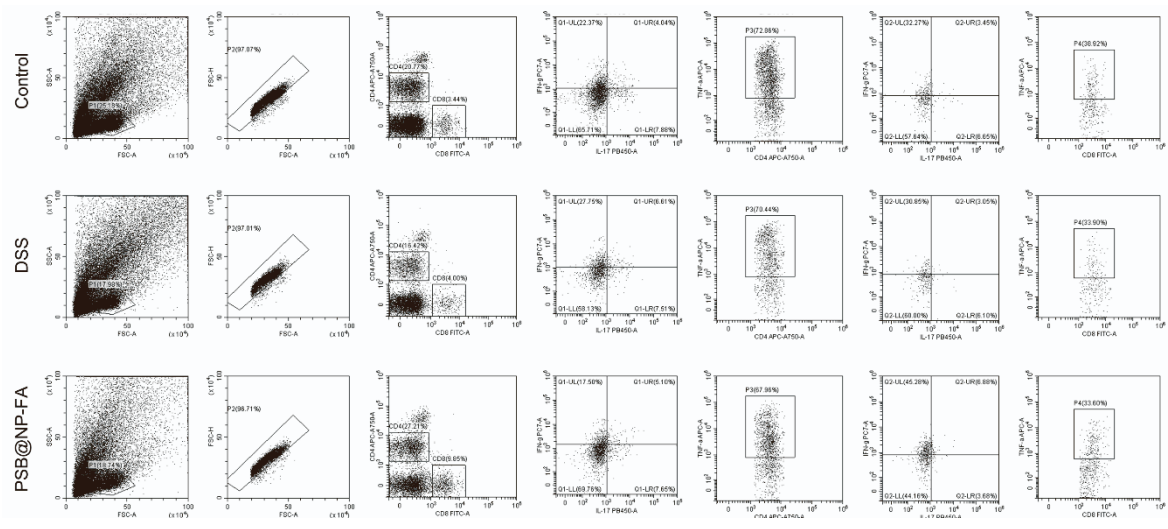

**Figure S14.** Scatter plots of Figure 7.

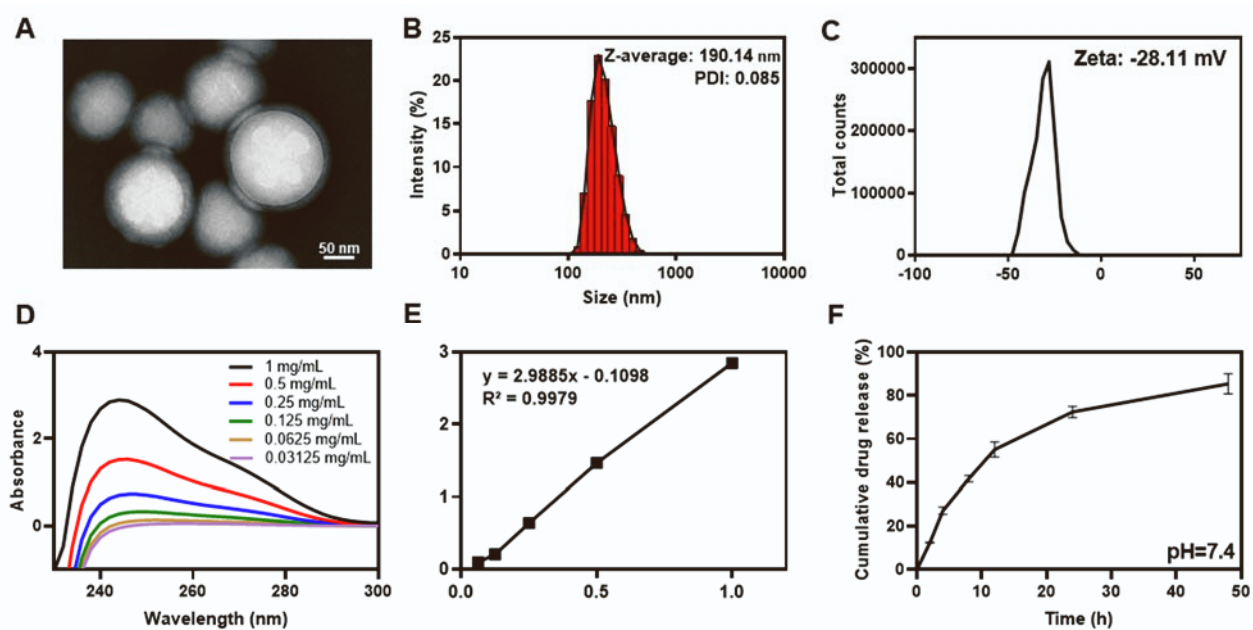

**Figure S15.** Characterization and *in vitro* drug-release profiles of DEX/PSB@NP-FA. (A) Representative TEM images of DEX/PSB@NP-FA. Scale bar: 50 nm. (B) Representative size distribution and PDI of DEX/PSB@NP-FA, (n=3). (C) Zeta potential of DEX/PSB@NP-FA, (n=3). (D) UV-vis absorption spectra of DEX with different concentrations. (E) The standard curve of DEX. (F) The release profile of DEX from PLGA (pH 7.4), (n=3).



**Table S1. Primers used for Real-time PCR.**

| <b>Gene</b>                    | <b>Forward primer (5'-3')</b> | <b>Reverse primer(5'-3')</b> |
|--------------------------------|-------------------------------|------------------------------|
| <b>TNF-<math>\alpha</math></b> | AGGCTGCCCCGACTACGT            | GACTTTCTCCTGGTATGAGATAGCAAA  |
| <b>IL-6</b>                    | ACAAGTCGGAGGCTTAATTACACAT     | TTGCCATTGCACAACCTTTTC        |
| <b>IL-1<math>\beta</math></b>  | TCGCTCAGGGTCACAAGAAA          | CATCAGAGGCAAGGAGGA AAAC      |
| <b>IL-12</b>                   | GCCAGTACACCTGCCACAAA          | TGTGGAGCAGCAGATGTGAGT        |
| <b>IL-10</b>                   | GTTGCCAAGCCTTATCGGA           | CTTCTACCCAGGGAATTCA          |
| <b>36b4</b>                    | TCCAGGCTTTGGGCATCA            | CTTTATCAGCTGCACATCACTCAGA    |
